# Supplementary material for: N6-Methyladenosine Regulates the Expression and Secretion of TGFβ1 to Affect the Epithelial–Mesenchymal Transition of Cancer Cells
Source: PubMed Central journal article supplement (PMC7072279; doi:10.3390/cells9020296), 2020-01-25
Supplement: cells-09-00296-s001.pdf [file cells-09-00296-s001.pdf]

**Table S1. Primers for mutagenesis.**

| <b>Name</b>          | <b>Primers</b>                                 |
|----------------------|------------------------------------------------|
| pGL3-basic-Mut-5'UTR | Forward – cgcccttctccctgaggccctcagtttcctcgag   |
|                      | Reverse – ctcgagggaaagctgagggcctcagggagaagggcg |
| pcDNA3-Mut-CDS       | Forward – gccggccggccgcccctatccacctgcaagac     |
|                      | Reverse – gtcttgagggtgataggcccggccggccggc      |

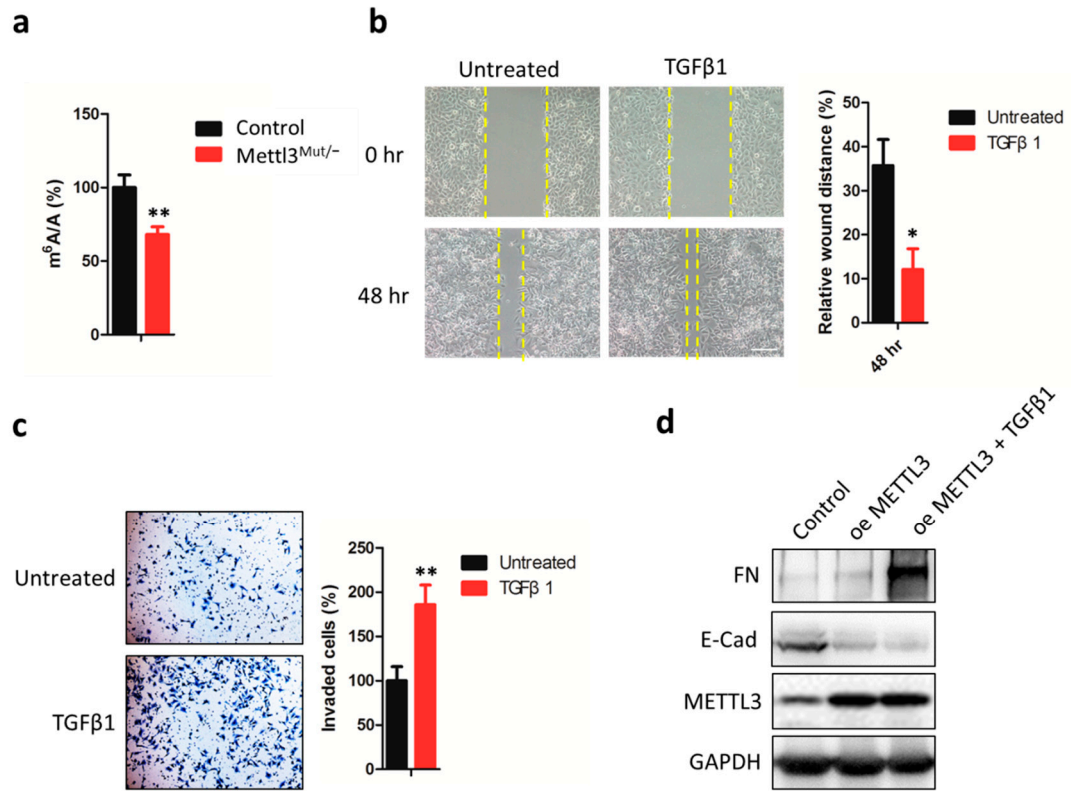

**Figure S1.** METTL3 regulates EMT in HeLa cells. (a) m<sup>6</sup>A/A ratio of total mRNA from control and Mettl3<sup>Mut/-</sup> cells were determined by LC-MS/MS; (b) Mettl3<sup>Mut/-</sup> cells transiently overexpressed METTL3 and then incubated with 10 ng/mL TGFβ1 for indicated times. The wound healing of cells was recorded (*left*) and quantitatively analyzed (*right*); scale bar, 100μm; (c) Mettl3<sup>Mut/-</sup> cells transiently overexpressed METTL3 and then incubated with 10 ng/mL TGFβ1 and cells were allowed to invade for 24 h. Invaded cells were tested by CytoSelect™ 24-well Cell Invasion assay kits (8 μm, colorimetric format; *left*) and quantitatively analyzed (*right*); (d) Mettl3<sup>Mut/-</sup> cells transiently overexpressed METTL3 and then incubated with or without 10 ng/mL TGFβ1 for 48 h. Protein levels of FN, E-Cad and METTL3 were measured by Western blot.

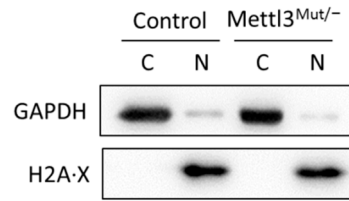

**Figure S2.** Quality control for fractionation. Cytoplasmic (C) and nuclear (N) fractions were separated from control and Mettl3<sup>Mut/-</sup> cells, respectively. Cytoplasmic marker GAPDH and nuclear marker H2A·X were detected by Western blot.

**a**

```
TATTCCGTGGGATACTGAGACACCCCGGTCCAAGCCTCCCTCCACCACTGCGCCCTTCTCCCTGAGGACCTCAGCTTCC
CTCGAGGCCCTCTACCTTTTGCCGGGAGACCCCGAGCCCTGCAGGGGCGGGGCTCCCCACCACACCAGCCCTGTTCCG
GCTCTCGGCAGTGGCGGGGGGCGCCGCTCCCCATGCCGCCCTCCGGGCTGCGGCTGCTGCCGCTGCTGCTACCGCTGCT
GTGGCTACTGGTGTGACGCTGGCCGCGCCGCGGACCTATCCACCTGCAAGACTATCGACATGGAGCTGGTGAAGC
GGAAGCGCATCGAGGCCATCCGCGGCCAGATCTGTCCAAGCTGCGGCTCGCCAGCCCCCGAGCCAGGGGGAGGTGCC
GCCCCGGCCCGCTGCCCGAGGCCGTGCTGCCCTGTACAACAGCACCCGCGACCCGGTGGCCGGGGAGAGTGCAGAACC
GAGCCCCGAGCTGAGGCCGACTACTACGCCAAGGAGGTACCCCGCTGCTAATGGTGGAAACCCACAACGAAATCTATGAC
AAGTTCAAGCAGAGTACACACAGCATATATATGTTCTTCAACACATCAGAGCTCCGAGAAGCGGTACCTGAACCCGTGTTGCT
CTCCCGGCGAGAGCTGCGTCTGCTGAGGCTCAAGTTAAAAGTGGAGCAGCAGCTGGAGCTGTACCAGAAAATACAGCAACA
ATTCTGGCGATACCTCAGCAACCGGCTGCTGGCACCCAGCAGCTCGCCAGAGTGTTATCTTTTGATGTACCCGGAGTTGT
GCGGCAGTGGTTGAGCCGTGGAGGGGAAATTGAGGGCTTTCGCTTAGCGCCACTGCTCTGTGACAGCAGGGATAACA
CACTGCAAGTGGACATCAACGCAGGGTTCACTACCGGCCGCGAGGTGACCTGGCCACCATTGATGGCATGAACCCGCTT
TCCTGCTTCTCATGGCCACCCCGCTGGAGAGGGCCAGCATCTGCAAAGCTCCCGCCACCCGAGCCCTGGACACCAACT
ATTGCTCAGCTCCACGGAGAAGAAGTGTGCTGCGTGGCAGCTGTACATTGACTTCCGCAAGGACCTCGGCTGGAAGTGGA
TCCACGAGCCAAAGGGCTACCATGCCAATTCTGCTCGGGCCCTGCCCTACATTTGGAGCTGGACACGCAGTACAGCAA
GGTCTGGCCCTGTACAACCAGCATAACCCGGGCGCCTCGGCGGCGCCGTGCTGCGTGGCGCAGGCGCTGGAGCCGCTGC
CCATCGTGTACTACGTGGGCCCAAGCCCAAGGTGGAGCAGCTGTCCAACATGATCGTGGCTCTGCAAGTGCAGCTGA
```

**b**

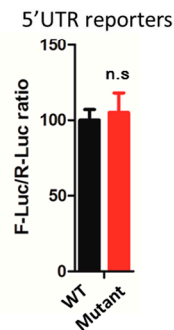

**c**

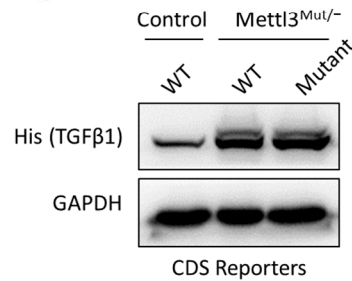

**Figure S3.** m<sup>6</sup>A methylation on both 5'UTR and CDS regions of TGFβ1 mRNA control its translation efficiency. (a) Sequence of TGFβ1 mRNA 5'UTR and CDS region (XM\_011527242.2). TGFβ1 5'UTR region is marked in blue. Mutation sites of potential m<sup>6</sup>A motifs were highlighted in red (mutation site: GGAC to GGCC); (b) WT-5'UTR or Mutant-5'UTR reporter was co-transfected with TK-Rluc reporter in Mettl3<sup>Mut/-</sup> cells for 48 h. Dual-luciferase assay was performed to measure F-Luc production, which was normalized to R-Luc levels; (c) WT-CDS or Mutant-CDS reporter was transfected in control or Mettl3<sup>Mut/-</sup> cells as indicated for 48hr. Expression levels of exogenous TGFβ1 (His) were measured by Western blot.

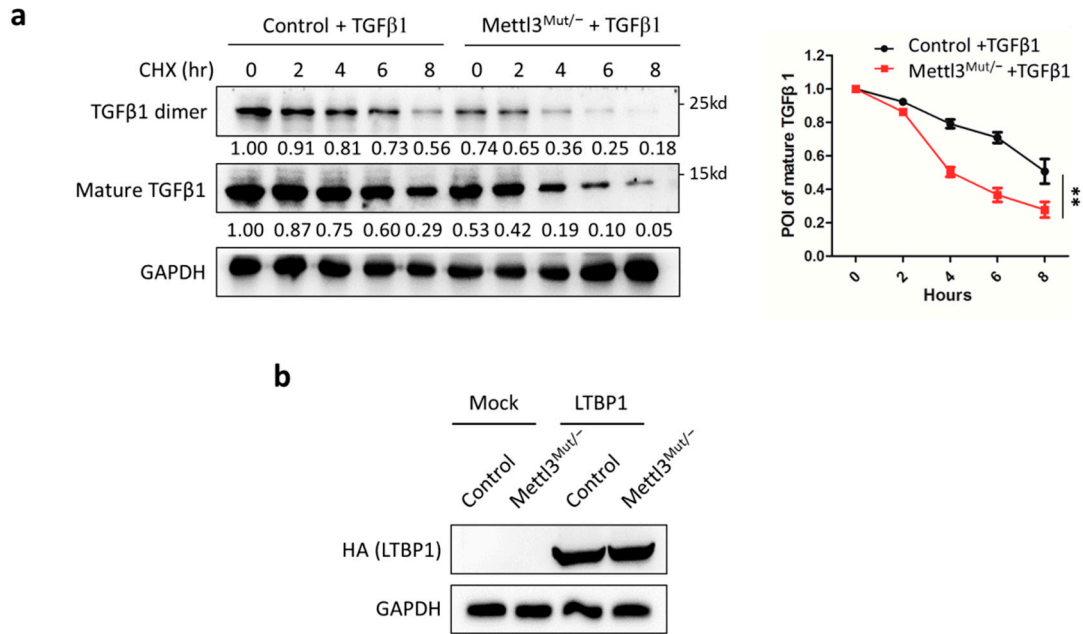

**Figure S4.** Protein stability and secretion of TGFβ1 are modulated by METTL3. **(a)** Control and Mettl3<sup>Mut/-</sup> cells were incubated with 10 ng/mL TGFβ1 for 48hr. 100μg/ml cycloheximide (CHX) was added into cells for indicated times. Protein levels of mature TGFβ1 and TGFβ1 dimer were measured by Western blot (*left*). Band intensities were analyzed by ImageJ and listed at the bottom of target bands. Mature TGFβ1 levels were quantitatively analyzed (*right*); **(b)** Empty vector (Mock) and HA-LTBP1 vector were transiently overexpressed in control and Mettl3<sup>Mut/-</sup> cells. Expression levels of exogenous LTBP1 were detected by Western blot.

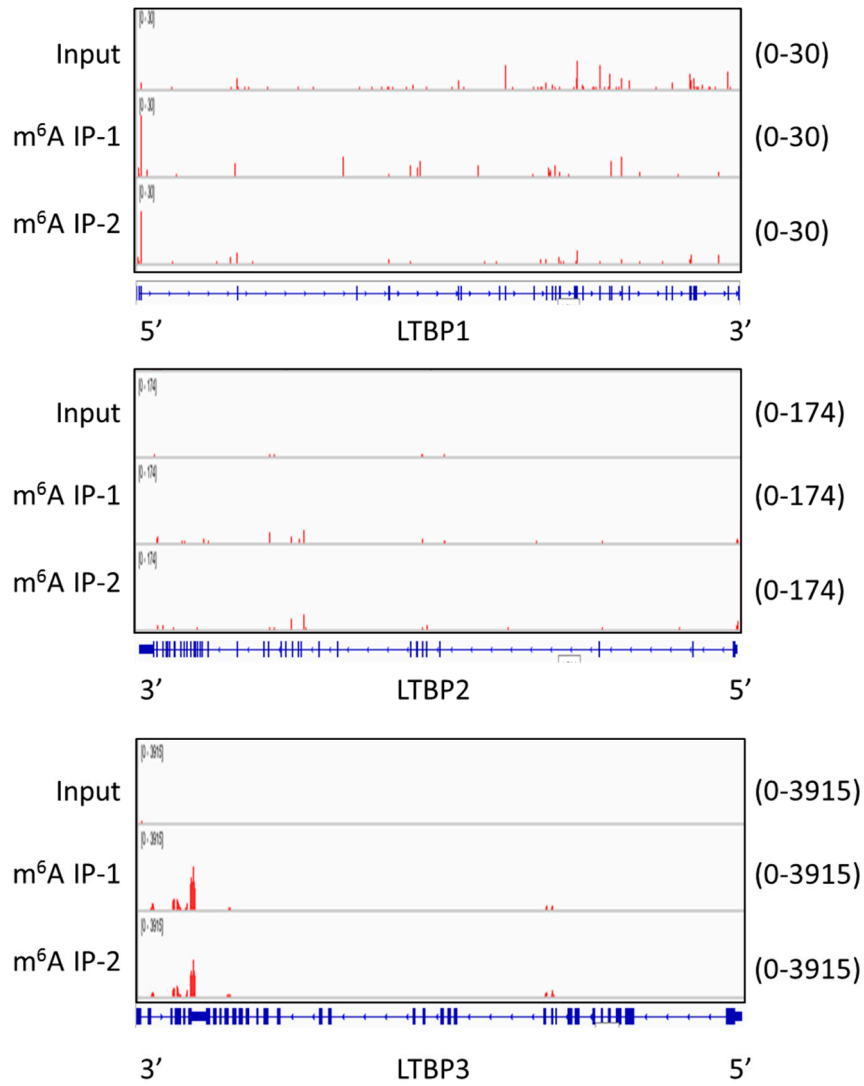

**Figure S5.** m<sup>6</sup>A peaks of LTBP1, LTBP2, LTBP3 in HeLa cells. m<sup>6</sup>A peak distributions of LTBP1, LTBP2 and LTBP3 mRNA from m<sup>6</sup>A RIP-seq data (Accession code GSE112795). m<sup>6</sup>A abundance of mRNA was listed on the right.
